# Supplementary material
Source: PubMed Central journal article supplement (PMC3900321)
Supplement: NIHMS518271-supplement-Supplemental_Figures.pdf [file NIHMS518271-supplement-Supplemental_Figures.pdf]

secondary challenge of B6-Rag1<sup>-/-</sup> mice

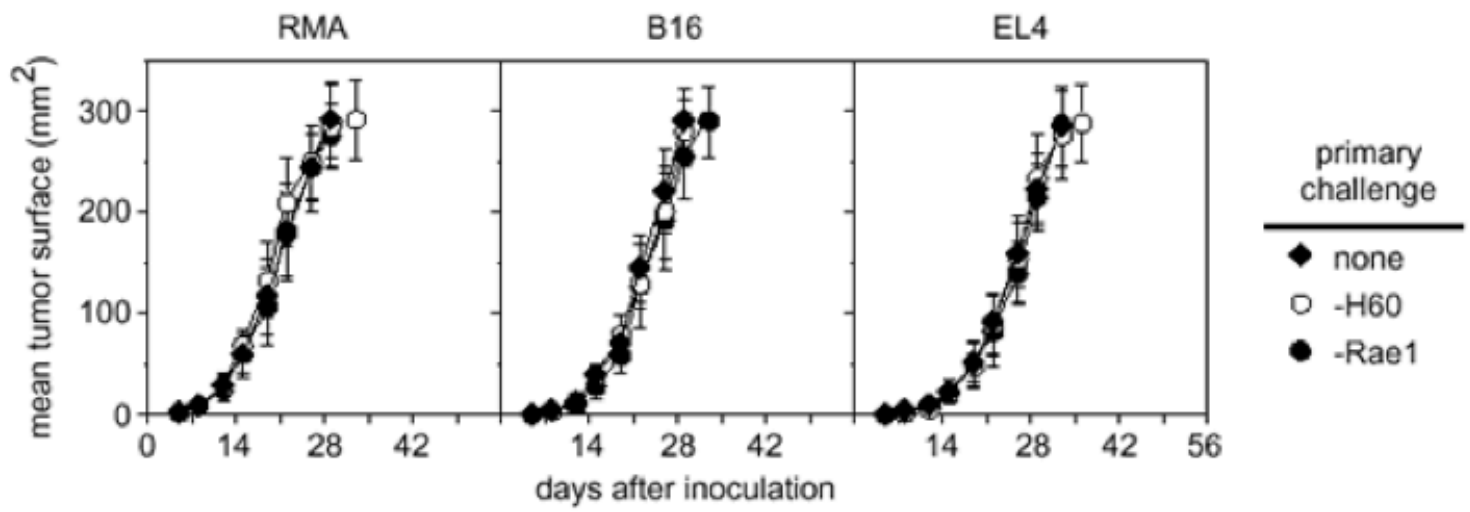

Supplemental Figure 1.

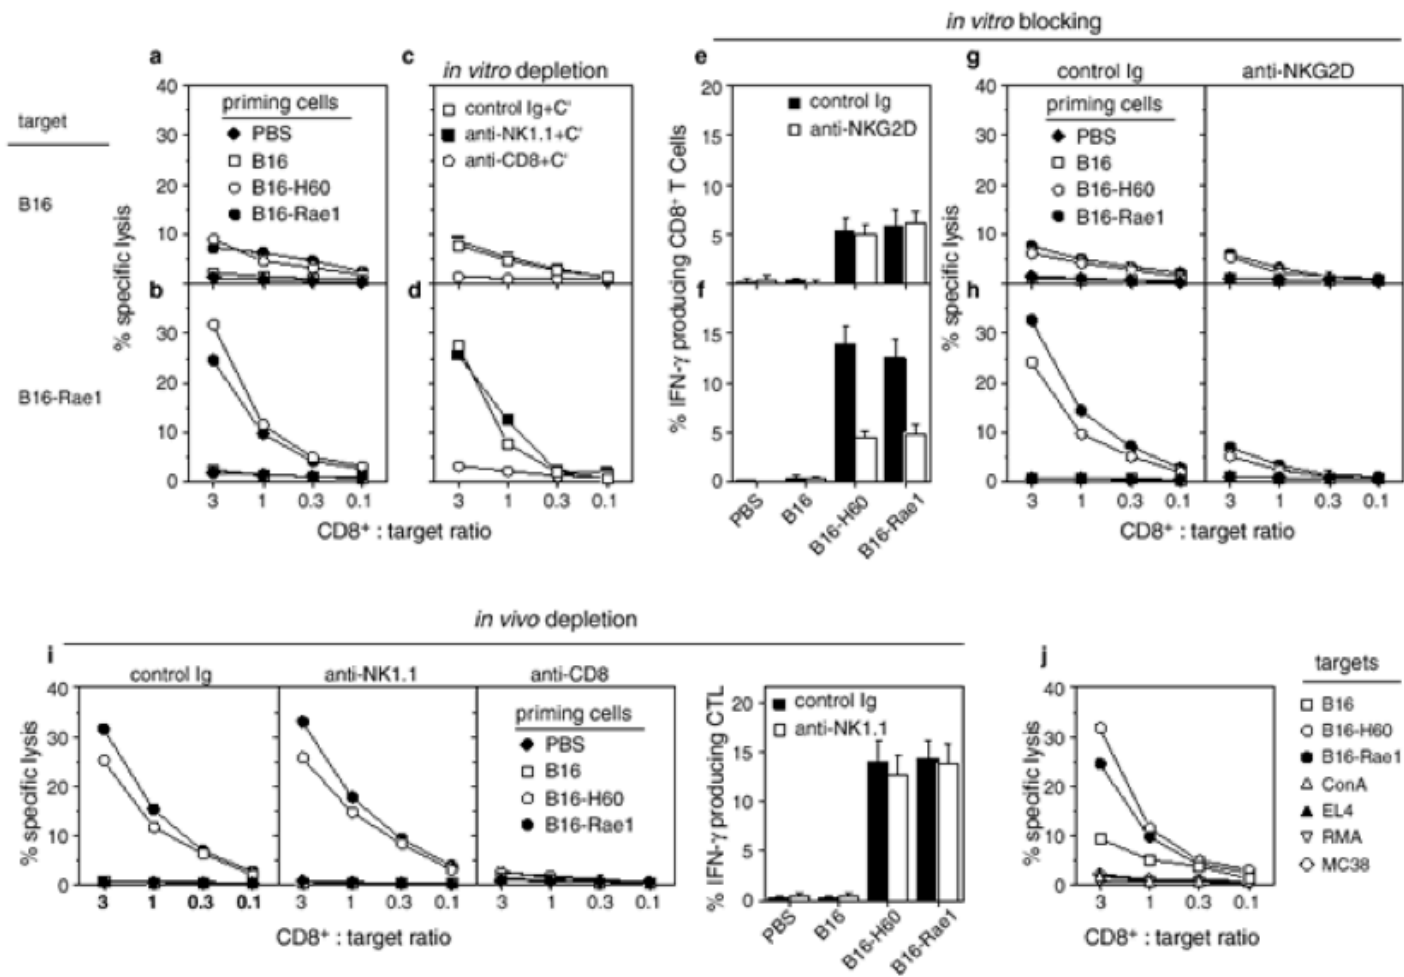

Supplemental Figure 2.

# B6-Rag1<sup>-/-</sup>

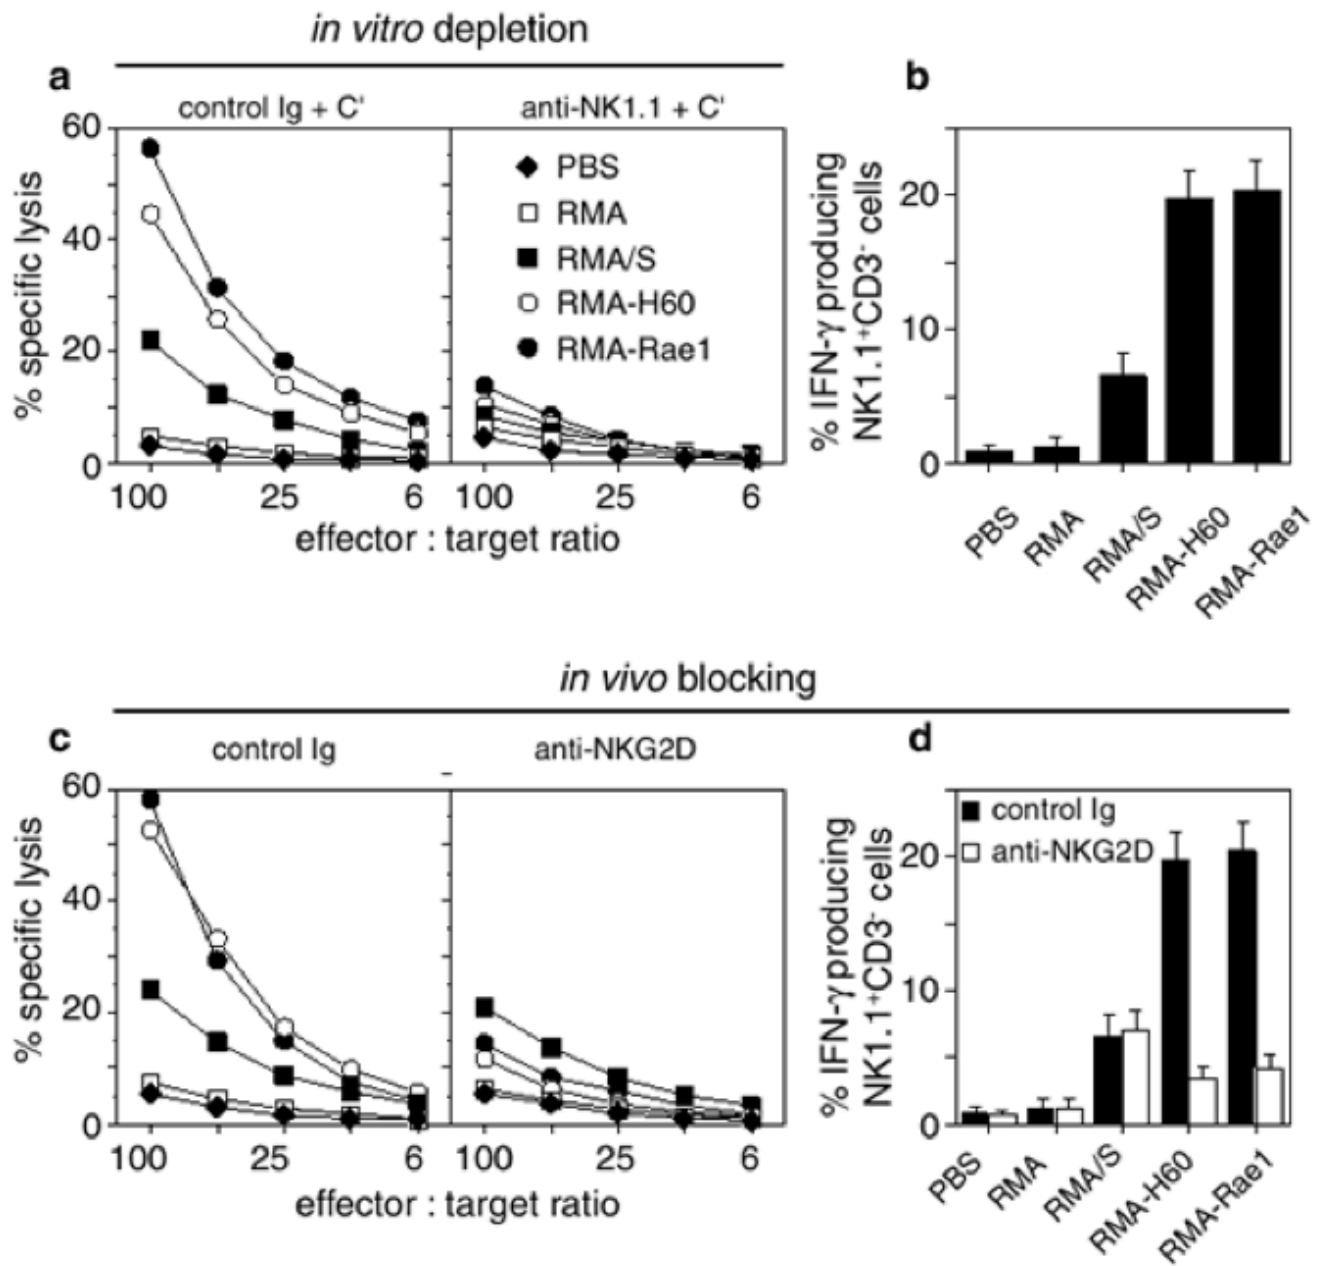

Supplemental Figure 3.

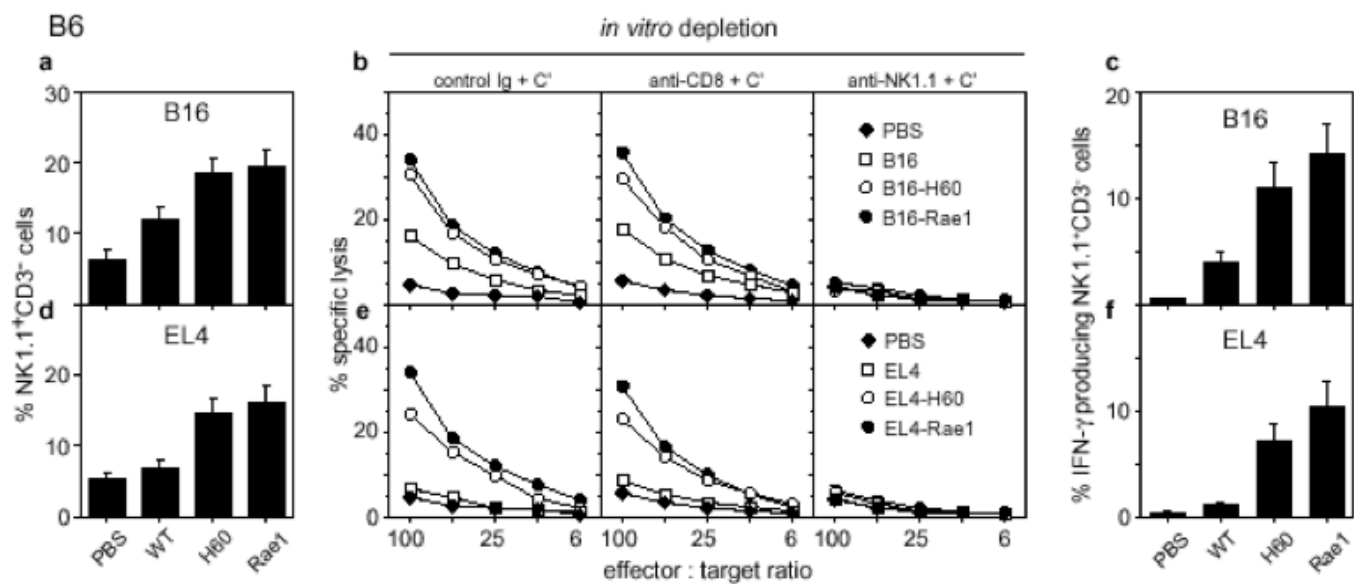

Supplemental Figure 4.
